# Supplementary material
Source: publisher figshare collection journal article supplement (https://acs.figshare.com/ndownloader/files/3601389)
Supplement: Supplementary file 1 [file 3601389]

# **Supplemental Material for**

## **Design principles of concentration dependent transcriptome deviations in drug-exposed differentiating stem cells**

By: Tanja Waldmann, Eugen Rempel, Nina V. Balmer, André König, Raivo Kolde, John Antonydas Gaspar, Margit Henry, Jürgen Hescheler, Agapios Sachinidis, Jörg Rahnenführer, Jan G. Hengstler, Marcel Leist

**This material is available free of charge via the Internet at <http://pubs.acs.org>.**

### **Table of contents**

**Figure S1:** Heatmaps and clustering of concentration dependent altered gene expression and expression motives

**Figure S2:** Comparison of the number of differentially expressed genes using different statistical approaches.

**Figure S3:** Distribution of p-values of a defined set of probesets (PS) at lower drug concentrations.

**Figure S4:** Box plot analysis of the concentration dependent expression courses corresponding to k-means clusters

**Table S1:** List of differentially regulated PS for each concentration

**Table S2:** List of gene ontology terms identified by analysis of the PS differentially regulated at 350, 550 and 1000  $\mu\text{M}$  VPA

**Table S3:** List of gene names corresponding to the sectors of the Venn diagrams in Figure 3

**Table S4:** List of TFBS corresponding to the sectors of the Venn diagrams in Figure 3

**Table S5:** List of gene ontology terms corresponding to the sectors of the Venn diagrams in Figure 4

**Table S6:** List of PS for each cluster shown in Figure 5

**Table S7:** List of gene ontology terms identified using the differential PS in the k-means clusters

**Table S8:** List of overrepresented gene ontology groups corresponding to Figure 6

**Figure S1**

**A PS**

**up-regulated**

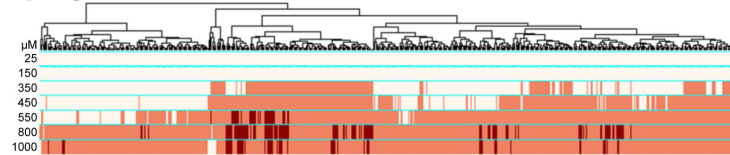

**down-regulated**

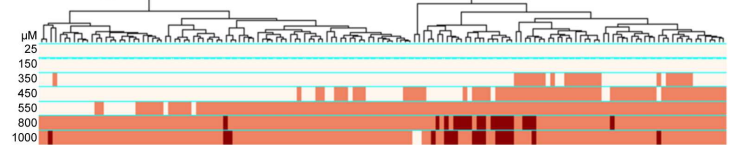

**B TFBS**

**up-regulated**

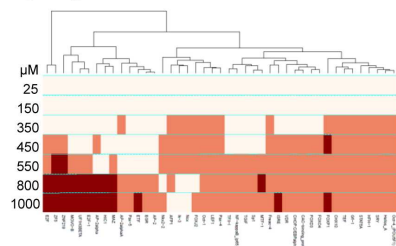

**down-regulated**

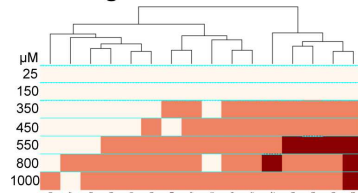

**C GO**

**up-regulated**

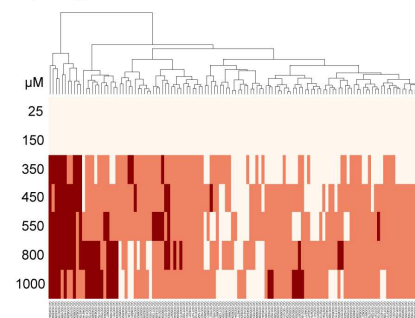

**down-regulated**

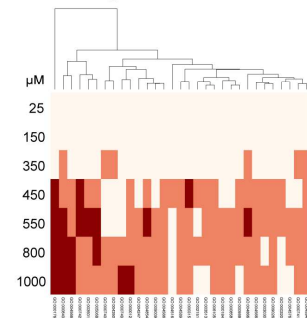

**Figure S1: Heatmaps and clustering of concentration dependent altered gene expression and expression motives**

(A) probesets, (B) overrepresented transcription factor binding sites, and (C) overrepresented GO groups. Similarity scores, indicated by the dendrogram at the top, were calculated based upon p-values obtained by limma t-test in (A) or by enrichment analysis in (B) and (C). Inclusion criterium for the analysis was a p-value  $< 0.001$ , taken over all concentrations. The *colours* of the heatmap describe the p-value of the according entity at the given concentration: *dark brown* means less than or equal to  $10^{-4}$ , *light brown* less than or equal to 0.05.

**Figure S2**

| [VPA]                      |      | 25<br>μM | 150<br>μM | 350<br>μM | 450<br>μM | 550<br>μM | 650<br>μM | 800<br>μM | 1000<br>μM |
|----------------------------|------|----------|-----------|-----------|-----------|-----------|-----------|-----------|------------|
| raw                        | UP   | 0        | 62        | 482       | 775       | 1038      | 1170      | 1785      | 2201       |
|                            | DOWN | 0        | 3         | 78        | 208       | 421       | 297       | 1091      | 1682       |
| Concentration<br>dependent | UP   | 0        | 0         | 273       | 554       | 955       | 656       | 1724      | 2070       |
|                            | DOWN | 0        | 0         | 33        | 110       | 344       | 118       | 910       | 1273       |
| Overall<br>adjustment      | UP   | 0        | 34        | 379       | 596       | 919       | 699       | 1585      | 1785       |
|                            | DOWN | 0        | 1         | 49        | 124       | 320       | 132       | 749       | 994        |

**Figure S2: Comparison of the number of differentially expressed genes using different statistical approaches.**

Numbers of differentially expressed PS identified per concentration, are indicated for three types of false discovery rate (FDR) adjustment. Analysis was performed separately for up-regulation and down-regulation. UP refers to PS with fold change of at least 2, DOWN to PS with FC of at most 0.5. “Raw”: PS with p-value  $p \leq 0.05$  without FDR adjustment. “Concentration dependent”: PS with p-value  $p \leq 0.05$  after adjustment separately for each concentration according to FDR adjustment using the Benjamini Yekutieli method (BY-FDR). “Overall adjustment”: Same as above, but all p-values for all concentrations were adjusted according to BY-FDR simultaneously across all concentrations.

**Figure S3**

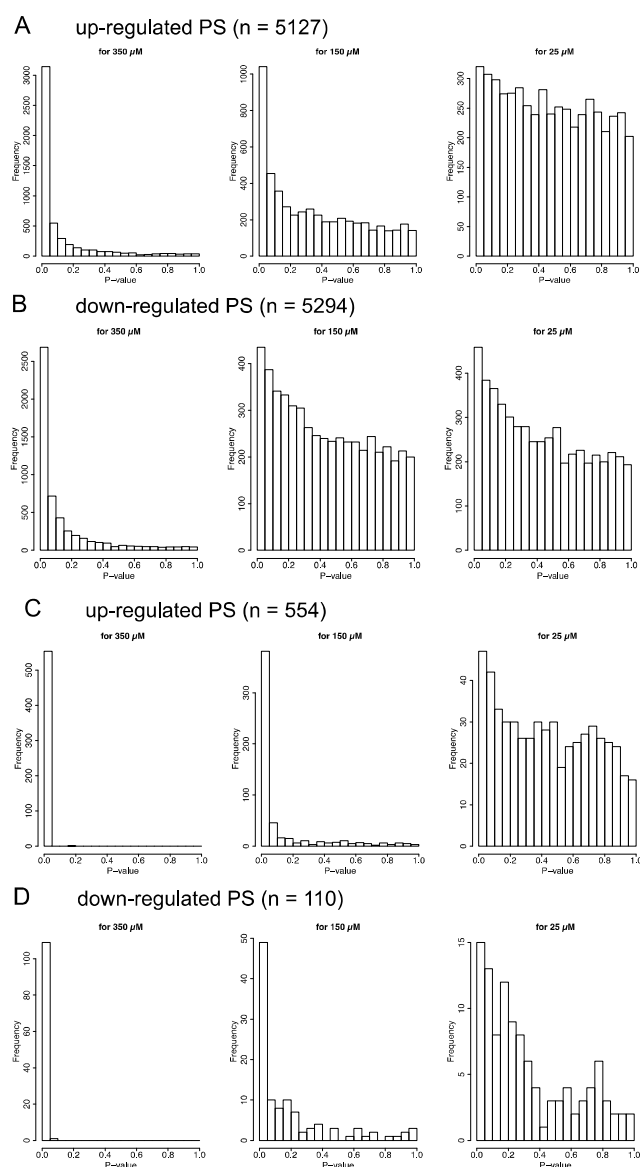

**Figure S3 Distribution of p-values of a defined set of probesets (PS) at lower drug concentrations**

(A,B) The PS (up: 5127; down: 5294) identified to be regulated by 450  $\mu\text{M}$  VPA ( $p < 0.05$  BY-FDR adjusted; no fold change (FC) cutoff) were examined for their regulation at lower drug concentrations. The p-values at 350  $\mu\text{M}$ , 150  $\mu\text{M}$ , and 25  $\mu\text{M}$  were calculated for each PS, and they were binned at steps of 0.05, and displayed as histograms. The y-axis indicates the number of PS in each bin. Note the different scaling of the axes in the panels for each concentration. (C,D) the procedure was similar as in (A,B), but the population of PS examined was the same as in Fig. 2B, i.e. the PS regulated at 450  $\mu\text{M}$  with  $p < 0.05$  and  $\text{FC} > 2$ .

**Figure S4**

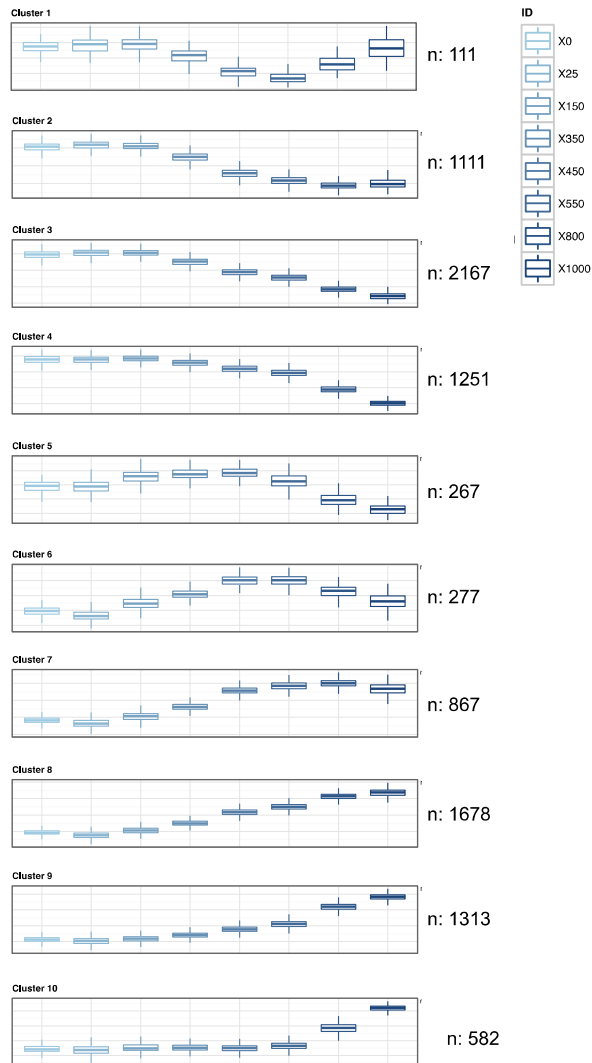

**Figure S4: Box plot analysis of the concentration-dependent expression courses corresponding to k-means clusters of Fig. 5**

For each concentration and each PS, averages were calculated across replicates. Then PS with a standard deviation (SD) across all concentrations of  $< 0.25$  were excluded (non-regulated PS), and the remaining probes were scaled (to mean 0 and variance 1). Finally, k-means clustering was applied to expression vectors of the PS across concentrations. The bottom and top of each box represent the first and third quartiles, the band inside the box corresponds to the median, and the ends of the whiskers are the limits of the 1.5-fold interquartile range (IQR) added to the lower or upper quartile, respectively.
